# Supplementary material for: Investigating the role of potassium cations during electrochemical CO2 reduction
Source: Royal Society of Chemistry journal article supplement (doi:10.1039/d2nr03438g), 2022-01-01
Supplement: d2nr03438g1.pdf [file d2nr03438g1.pdf]

## Investigating the Role of Potassium Cations During CO<sub>2</sub> Reduction

Sanjana Chandrashekar<sup>1</sup>, Hugo Pieter Iglesias van Montfort<sup>1</sup>, Divya Bohra<sup>1</sup>, Georgy Filonenko<sup>2</sup>, Hans Geerlings<sup>1</sup>, Thomas Burdyny<sup>1</sup>, Wilson A. Smith<sup>1</sup>

<sup>1</sup>Materials for Energy Conversion and Storage (MECS), Department of Chemical Engineering, Delft University of Technology, 2629 HZ, Delft, The Netherlands

<sup>2</sup>Inorganic Systems Engineering (ISE), Department of Chemical Engineering, Delft University of Technology, Van der Maasweg 9, 2629 HZ Delft, The Netherlands

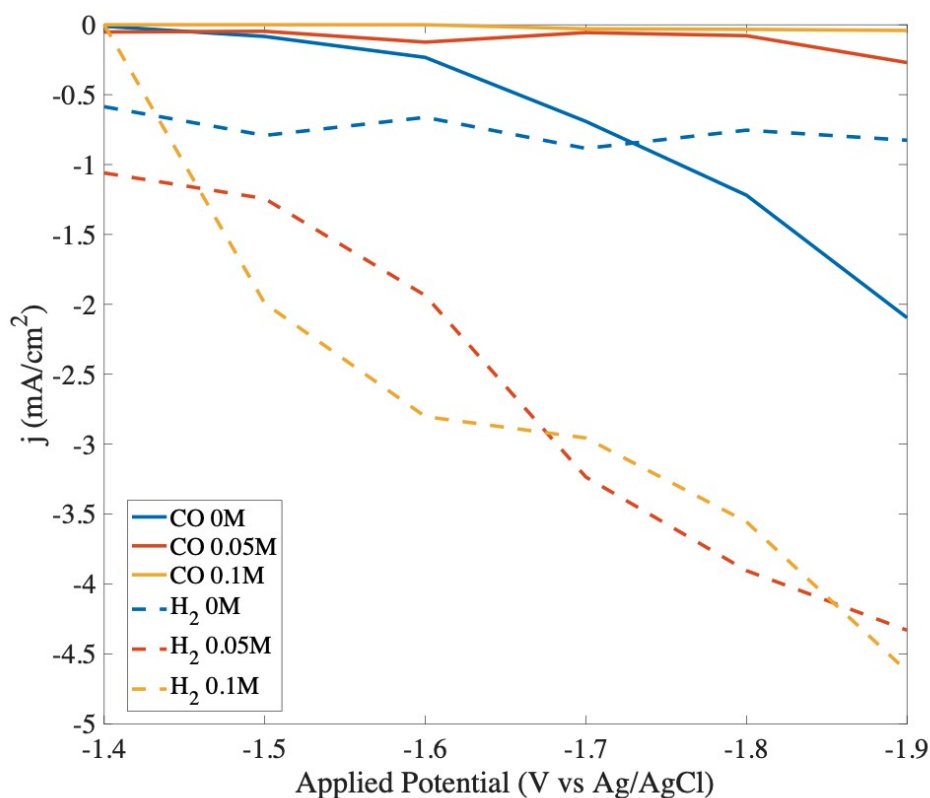

Figure S 1 - partial current densities of CO and H<sub>2</sub> at increasing negative potentials, depicting the increase in partial current density of H<sub>2</sub> with increase in cryptand concentrations.

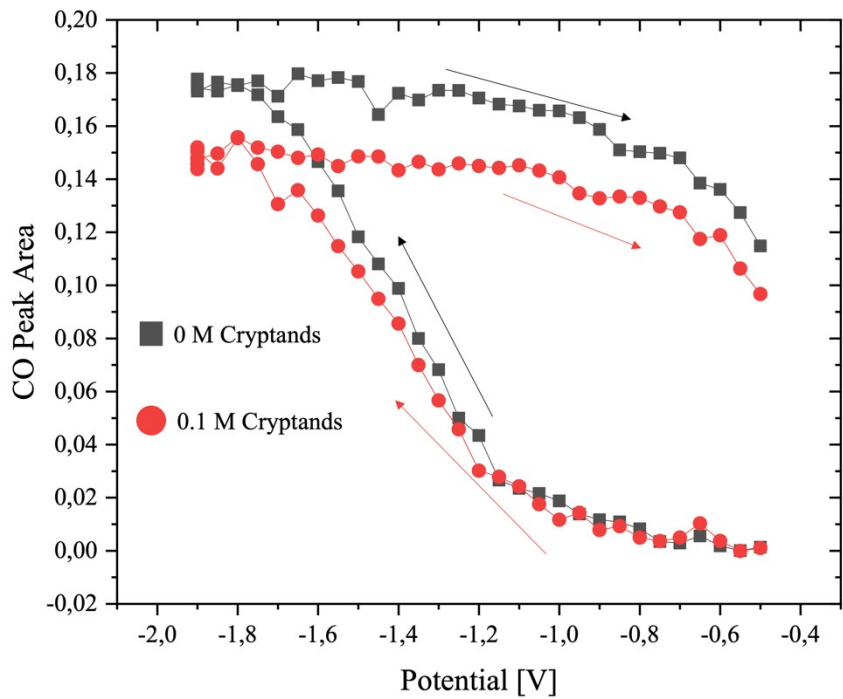

Figure S 2 - Forward and backward scans of CO at different concentrations of cryptands showing minimal difference in peak areas during backward scans.
